# Supplementary material for: A 3′-end structure in RNA2 of a crinivirus is essential for viral RNA synthesis and contributes to replication-associated translation activity
Source: PubMed Central journal article supplement (PMC5046102; doi:10.1038/srep34482), 2016-10-03

1 **Supplementary Information**

2  
3 **A 3'-end structure in RNA2 of a crinivirus is essential for viral RNA synthesis and**  
4 **contributes to replication-associated translation activity**

5  
6 Chawin Mongkolsiriwattana<sup>1,\*</sup>, Jaclyn S. Zhou<sup>1,\*</sup> & James C. K. Ng<sup>1</sup>

7  
8 \*Both authors contributed equally to this work

9  
10 <sup>1</sup>Department of Plant Pathology and Microbiology, University of California, Riverside,  
11 Riverside, California, USA

12  
13 Corresponding author: J.C.K.N

14 (email: [jamesng@ucr.edu](mailto:jamesng@ucr.edu))

25 **Note S1**

26 ***In vitro* luciferase assays to determine the role of the YSS in translation.** The luciferase  
27 activities of LUC-TMV and LUC-R1 were 141- to 181- (ave. 161) fold and 294- to 374- (ave.  
28 334) fold, respectively, higher than that of LUC-R2A, the reference standard (Supplementary  
29 Fig. S1a and S1b). These results were consistent with those of the *in vivo* assays (Fig. 3b),  
30 suggesting that the 5' and 3' NCRs of LCV RNA1 (but not those of LCV RNA2) supported  
31 significant translation activity. We next compared the luciferase activity of LUC-R2A and LUC-  
32 R2A(-). In LUC-R2A(-), the GFP nt sequence replacing the 98-nt in LUC-R2A was predicted  
33 by *mfold* to not form any secondary structures resembling the SL of the 98-nt. The luciferase  
34 activities of LUC-R2A and LUC-R2A(-) were comparably low and not significantly different  
35 from each other (Supplementary Fig. S1b). These results were clearly consistent with those of  
36 the *in vivo* assays (Fig. 3b), demonstrating that the 5' and 3' NCRs of LCV RNA2 did not  
37 participate in translation. To further rule out that the YSS of LCV RNA2 was involved in  
38 translation *in vitro*, another series of luciferase reporter constructs were engineered with different  
39 lengths of the 5' and 3' terminal sequences of LCV RNA2 (Supplementary Fig. S1a). Construct  
40 LUC-R2A was used as a standard to compare how different lengths of the 5' and 3' end  
41 sequences of LCV RNA2 might affect the luciferase activity. The luciferase activities of LUC-  
42 R2B and LUC-R2C were not significantly different from that of LUC-R2A (Supplementary Fig.  
43 S1a and S1b). Furthermore, the luciferase activity of LUC-R2C(-) (Supplementary Fig. S1a), a  
44 modified reporter LUC-R2C in which the 3' terminal sequences of LCV RNA2 were substituted  
45 with a sequence of identical length (400 nts) randomly selected from the GFP coding sequence,  
46 was as low as, and not significantly different from, that of LUC-R2C (Supplementary Fig. S1c).  
47 Taken together, this suggests that the terminal 3' (400 nts) sequence, which contains the YSS of

48 LCV RNA2, does not support translation *in vitro*. To investigate if additional nts from the 5' end  
49 of the first ORF (encoding P5.6) might be required for translation of LCV RNA2 *in vitro*,  
50 additional luciferase reporter constructs, LUC-R2D and LUC-R2E, were generated  
51 (Supplementary Fig. S1a). The luciferase activities of LUC-R2D and LUC-R2E were still  
52 minimal, although they were significantly lower than that of LUC-R2A (Supplementary Fig.  
53 S1c). However, because the luciferase activities of LUC-R2D (which contained an incomplete  
54 YSS) and LUC-R2E (which contained a complete YSS) were not significantly different from  
55 each other, this suggested that there was no correspondence between the reduced luciferase  
56 activities and the presence or absence of the YSS. This further demonstrates that the 5' NCR and  
57 the YSS-containing 3' terminal region of LCV RNA2 are not involved in translation *in vitro*. To  
58 determine whether SL1 or SL2 of the YSS of LCV RNA2 was involved in translation, we  
59 deleted SL1 or SL2 in LUC-R2C. The resulting constructs, LUC-R2CΔSL1 and LUC-  
60 R2CΔSL2 (Supplementary Fig. S1a), showed no significant changes in luciferase activities  
61 compared to LUC-R2C (Supplementary Fig. S1c), suggesting that neither SL1 nor SL2 of LCV  
62 RNA2 was involved in *in vitro* translation.

63

## 64 **Methods**

### 65 **The construction of pCM1 (LCV RNA1)/pCM2 (LCV RNA2) mutants and luciferase**

66 **reporter constructs.** Mutant pR1-3'R2: To replace the 98-nt of LCV RNA1 with that of LCV

67 RNA2, two independent PCRs were performed. The first reaction was performed using

68 oligonucleotide primers LCV-91-CN and LCV-219-CM (with pCM1 as template), while the

69 second reaction was performed using LCV-220-CM and LCV-164-CM (with pCM2 as

70 template). The PCR amplified products were gel-purified using the QIAquick Gel Extraction Kit

71 (Qiagen, Valencia, CA), and 50 ng of each gel-purified product were subjected to overlapping  
72 extension PCR using LCV-91-CN and LCV-164-CM. The resulting product was gel-purified,  
73 adenylated and cloned into the pGEM-T Easy vector (Promega Corp., Madison, WI). The  
74 recombinant pGEM-T Easy vector was digested with restriction enzymes HpaI and NdeI (New  
75 England Biolabs), and the released DNA fragment was subcloned into similarly digested pCM1,  
76 resulting in the mutant construct pR1-3'R2.

77 Mutant pR2-3'R1: replacement of the 98-nt of LCV RNA2 with that of LCV RNA1 was  
78 achieved in the same manner as for the replacement of the 98-nt of LCV RNA1 with that of LCV  
79 RNA2 as described above, except that the two independent PCRs were performed by using  
80 LCV-161-CM and LCV-221-CM (with pCM2 as template), and LCV-222-CM and LCV-223-  
81 CM (with pCM1 as template). The overlapping extension PCR was performed using LCV-161-  
82 CM and LCV-223-CM, and restriction digestion of the recombinant pGEMT-T Easy vector and  
83 pCM2 was made using AatII and NgoMIV.

84 Mutant p5'Δ50: the pCM2 mutant with a deletion of 50 nts from the proximal 5'-end of  
85 the 98-nt of LCV RNA2, was constructed using pCM2 as template, and essentially in the same  
86 manner as for the construction of pR1-3'R2 except that the two independent PCRs were  
87 performed using LCV-161-CM and LCV-162-CM, and LCV-163-CM and LCV-164-CM,  
88 followed by overlapping extension PCR using LCV-161-CM and LCV-164-CM. Restriction  
89 digestion of pCM2 and the recombinant pGEMT-T Easy vector containing the overlapping  
90 extension PCR product was made using restriction enzymes AatII and ApaI.

91 Mutants p3'Δ4, p3'Δ11, p3'Δ24, p3'Δ38, and p3'Δ48: the pCM2 mutants with various  
92 deletions engineered in the proximal 3'-end of the 98-nt of LCV RNA2 were constructed by  
93 using the forward oligonucleotide primer LCV-161-CM and one of the following reverse

94 primers: LCV-166-CM (p3' $\Delta$ 4), LCV-176-CM (p3' $\Delta$ 11), LCV-175-CM (p3' $\Delta$ 24), and LCV-188-  
95 CM (p3' $\Delta$ 38), and LCV-167-CM (for constructing p3' $\Delta$ 48). All PCR amplified products were  
96 gel-purified, adenylated, and cloned into the pGEM-T Easy vector. Restriction digestions using  
97 AatII and ApaI were performed to release the DNA fragments from the resulting recombinant  
98 pGEM-T Easy vectors. The released DNA fragments were subcloned into similarly digested  
99 pCM2, resulting in the respective final products.

100 Mutants p $\Delta$ SL1, pSLD1-1, pSLD1-2 and pSLR1: the pCM2 mutants with specific  
101 mutations engineered in the stem loop (SL1) located within the 98-nt (-23 to -61 nts) upstream of  
102 the final nt at the 3' end of RNA2 were constructed using pCM2 as template, and in the same  
103 manner as for the construction of pR1-3'R2. The first PCR product was generated using the  
104 forward oligonucleotide primer LCV-161-CM and one of the following reverse primers: LCV-  
105 189-CM (for constructing p $\Delta$ SL1), LCV-191-CM (pSLD1-1), and LCV-193-CM (pSLD1-2 and  
106 pSLR1). The second PCR product was generated using reverse primer LCV-164-CM and one of  
107 the following forward primers: LCV-190-CM (for constructing p $\Delta$ SL1), LCV-192-CM (pSLD1-  
108 1), and LCV-194-CM (pSLD1-2 and pSLR1). Overlapping extension PCR of 50 ng of each of  
109 the gel-purified form of the above PCR products was performed using oligonucleotide primers  
110 LCV-161-CM and LCV-164-CM. The resulting PCR amplified products were gel-purified,  
111 adenylated, and cloned into pGEM-T Easy vector. The recombinant pGEM-T Easy vector  
112 containing the intermediate product (generated by the overlapping PCR above) to be used for the  
113 construction of p3'SLR1 was used as a template for another PCR to introduce the mutation  
114 needed to make this mutant. The first PCR was performed using oligonucleotide primer LCV-  
115 161-CM and LCV-191-CM; the second PCR was performed using LCV-164-CM and LCV-192-

116 CM. Overlapping extension PCR (using LCV-161-CM and LCV-164-CM) and cloning of the  
117 gel purified products into pGEM-T Easy vector were as described above.

118 The recombinant pGEM-T Easy vectors containing the PCR products for constructing  
119 Mutants p $\Delta$ SL1, pSLD1-1, pSLD1-2 and pSLR1 were digested with AatII and ApaI, and the  
120 released DNA fragments were subcloned into similarly digested pCM2, resulting in the  
121 respective final products.

122 Mutant p $\Delta$ SL2: the pCM2 mutant engineered without SL2, the stem loop located within  
123 the 3'-terminal region (-65 to -96 nts upstream of the final nt at the 3' end) of RNA2, was  
124 constructed using pCM2 as template, and in the same manner as that used for constructing pR1-  
125 3'R2. The first PCR product was generated using the forward oligonucleotide primer LCV-161-  
126 CM and the reverse primer LCV-286-CM. The second PCR product was generated using the  
127 forward primer LCV-287-CM and the reverse primer LCV-164-CM. Overlapping extension  
128 PCR of 50 ng of each of the gel-purified form of the above PCR products was performed using  
129 oligonucleotide primers LCV-161-CM and LCV-164-CM. The resulting PCR amplified  
130 products were gel-purified, adenylated, and cloned into pGEM-T Easy vector. The recombinant  
131 pGEM-T Easy vectors containing the PCR products were digested with AatII and ApaI, and the  
132 released DNA fragments were subcloned into similarly digested pCM2, resulting in p $\Delta$ SL2.

133 Luciferase reporter constructs LUC-R1, LUC-R2A, LUC-R2B, LUC-R2C, LUC-  
134 R2CASL1, LUC-R2CASL2, and LUC-TMV were generated in three steps. Step 1: the luciferase  
135 T7 Control DNA (Promega) was used as a template to amplify out the luciferase DNA fragment  
136 by PCR using the oligo-primers LUC-001-CM and LUC-002-CM. The resulting PCR amplified  
137 product was gel-purified and set aside for the next step. Step 2: the bacteriophage T3 promoter  
138 followed by nt sequences corresponding to the 5'-terminal region of LCV RNA1, LCV RNA2 or

139 TMV RNA (each to be engineered upstream of the luciferase gene) were generated by PCR-  
140 mediated modifications. The PCRs were performed using one of the following oligo-primer  
141 pairs and DNA templates: LCV-89-CN/LCV-290-CM and pCM1 (for construction of LUC-R1),  
142 LCV-101-CM/LCV-293-CM and pCM 2 (for construction of LUC-R2A, LUC-R2B, LUC-R2C,  
143 LUC-R2C $\Delta$ SL1, and LUC-R2C $\Delta$ SL2), and TMV-001-CM/TMV-002-CM and TMV30BGFP<sup>1</sup>  
144 (for construction of LUC-TMV). The resulting products were gel-purified and each product,  
145 along with the luciferase DNA fragment (from step 1), were subjected to overlapping PCR using  
146 one of the following oligo-primer pairs: LCV-89-CN/LCV-292-CM (for construction of LUC-  
147 R1); LCV-101-CM/LCV-296-CM (for construction of LUC-R2A), LCV-101-CM/LCV-304-CM  
148 (for construction of LUC-R2B), LCV-101-CM/LCV-302-CM (for construction of LUC-R2C,  
149 LUC-R2C $\Delta$ SL1, and LUC-R2C $\Delta$ SL2); and TMV-001-CM/TMV-005-CM (for construction of  
150 LUC-TMV). Thus, the resulting PCR products contained the bacteriophage T3 promoter  
151 followed consecutively by the specific viral sequences and the luciferase gene. Step 3: DNA  
152 sequences corresponding to the 3'-terminal region of the LCV and TMV30BGFP genomes (each  
153 to be engineered downstream of the luciferase gene) were generated by PCR-mediated  
154 modifications. The PCRs were performed using one of the following oligo-primer pairs and  
155 DNA templates: LCV-291-CM/ LCV-92-CN and pCM1 (for construction of LUC-R1); LCV-  
156 303-CM/ LCV-295-CM and pCM2 (for construction of LUC-R2A), LCV-297-CM/LCV-295-  
157 CM and pCM2 (for construction of LUC-R2B), LCV-301-CM/LCV-295-CM and pCM2 (for  
158 construction of LUC-R2C, LUC-R2C $\Delta$ SL1, and LUC-R2C $\Delta$ SL2); and TMV-003-CM/TMV-  
159 004-CM and TMV30BGFP (for construction of LUC-TMV). The resulting PCR products were  
160 gel-purified and used for overlapping PCRs with the matching products from step 2 (i.e.  
161 overlapping PCR was performed using a PCR product with nucleotide sequences corresponding

162 to the 5' terminal region in the RNA of one virus and one with nucleotide sequences  
163 corresponding to the 3' terminal region in the RNA of the same virus). The overlapping PCRs  
164 were performed using one of the following oligo-primer pairs: LCV-89-CN/ LCV-92-CN (for  
165 construction of LUC-R1), LCV-101-CM/LCV-295-CM (for construction of LUC-R2A, LUC-  
166 R2B, LUC-R2C, LUC-R2C $\Delta$ SL1, and LUC-R2C $\Delta$ SL2), and TMV-001-CM/TMV-004-CM (for  
167 construction of LUC-TMV). The resulting PCR products were gel-purified, adenylated, and  
168 cloned into the pGEM-T Easy vector.

169       Luciferase reporter constructs LUC-R2D and LUC-R2E: To engineer additional nts from  
170 the 5' end of the P5.6 ORF to the 5' NCR sequence of LCV RNA2 flanking the luciferase gene in  
171 LUC-R2A and LUC-R2C, two PCRs were performed. The first reaction was performed using  
172 oligo-primer pairs LCV-101-CM/LCV-305-CM and the pCM2 template. The second reaction  
173 was performed using oligo-primer pairs LCV-306-CM/LCV-295-CM and the LUC-R2A or the  
174 LUC-R2C template. The PCR amplified products were gel-purified, and 50 ng of each gel-  
175 purified product were combined and subjected to overlapping extension PCR using LCV-101-  
176 CM and LCV-295-CM. The resulting products were gel-purified, adenylated and cloned into the  
177 pGEM-T Easy vector, resulting in LUC-R2D and LUC-R2E.

178       Luciferase reporter constructs LUC-R2A(-) and LUC-R2C(-): To substitute the LCV  
179 RNA2 sequences located downstream of the luciferase gene (in constructs LUC-R2A and LUC-  
180 R2C) with nucleotide sequences of equivalent sizes from the coding region of the GFP gene, two  
181 independent PCRs were performed. The first reaction was performed using oligo-primer pairs  
182 LCV-101-CM/LCV-307-CM and the LUC-R2A or the LUC-R2C template. The second reaction  
183 involved amplifying out two different length fragments (98 nts and 400 nts) of the GFP coding  
184 sequence from the TMV30BGFP template by using the forward oligo-primer LCV-308-CM and



185 one of two reverse oligo-primers: LCV-309-CM [for construction of LUC-R2A(-)] or LCV-310-  
186 CM [for LUC-R2C(-)] . The resulting products were gel-purified and 50 ng of each gel-purified  
187 product were combined and subjected to overlapping extension PCR using oligo-primer pairs  
188 LCV-101-CM/LCV-309-CM [for construction of LUC-R2A(-)] or LCV-101-CM/LCV-310-CM  
189 [for construction of LUC-R2C(-)]. The resulting product was gel-purified, adenylated and  
190 cloned into the pGEM-T Easy vector, resulting in LUC-R2A(-) and LUC-R2C(-).

191 All standard molecular procedures were performed according to Sambrook and Russell<sup>2</sup>.  
192 All cDNA clones were transformed into *Escherichia coli DH5α* competent cells and grown in  
193 Luria-Bertani broth containing ampicillin (100 µg/ml; Sigma-Aldrich, St. Louis, MO). All  
194 cloned products derived from PCR-amplification were sequenced in both directions.

195

196 ***In vitro* translation assays.** FLuc reporter constructs (2 µg) were linearized by restriction  
197 enzyme digestion using NgoMIV or KpnI (in the case of LUC-TMV). The linearized DNA then  
198 served as a template for the *in vitro* synthesis of RNA transcripts using the T3 mMessage  
199 mMACHINE kit (Life Technologies). 0.2 pmol of the *in vitro* produced capped transcript of  
200 each FLuc reporter construct was added to a mixture containing wheat germ extract (Promega),  
201 unlabeled amino acid mixture, potassium acetate (93 mM final concentration), and MgCl<sub>2</sub> (2.1  
202 mM final concentration) in a total volume of 25 µl according to the manufacturer's instructions  
203 and Wang et al<sup>3</sup>. The reaction was incubated at 25°C for 1 hr, and 2 µl of the reaction was mixed  
204 with 50 µl of Luciferase assay reagent (Promega) right before luciferase measurements were  
205 taken. Translation activity was based on the FLuc measurement of each sample relative to that  
206 of the LUC-R2A sample.

207

208 **5'-RACE.** 5'-Rapid Amplification of cDNA Ends (RACE) was used to analyze the 5' terminus  
209 of the minus-sense progenies. Approximately 5 µg of total RNA sample from protoplasts  
210 collected at 96 hpi were subjected to reverse transcription by SuperScript II® reverse  
211 transcriptase (Invitrogen) using gene-specific primers LCV-27 and LCV-161 (Table S1 in the  
212 supplemental material) for cDNA synthesis specific to LCV RNAs 1 and 2, respectively. The  
213 first strand cDNAs were purified using QIAquick PCR purification kit. The resulting purified  
214 cDNAs were tailed using 1 µl (15U/µl) terminal deoxynucleotidyl transferase (Invitrogen) with  
215 either dCTP (for analyzing the progenies generated from p3'Δ4, p3'Δ11, and p3'Δ24), or dTTP  
216 (for analyzing the progenies generated from pCM1, pCM2, pR1-3'R2, pR2-3'R1, and pSLR1).  
217 The tailed products were subjected to PCR using oligonucleotide primers AAP(T) and LCV-28  
218 (for amplification of RNA1-based sequences from pCM1 and mutant pR1-3'R2), AAP(T) and  
219 LCV-103 (for amplification of the RNA2-based sequences from pCM2 and mutants pR2-3'R1,  
220 and pSLR1), or AAP(C) and LCV-103 (for amplification of the RNA2-based sequences from  
221 mutants p3'Δ4, p3'Δ11, and p3'Δ24) (Table S1 in the supplemental material). The amplified  
222 products were diluted 1:100 in 1 x TE (10mM Tris, 1mM EDTA, pH 8) and used for another  
223 round of PCR using oligonucleotide primers AUAP (Invitrogen) and LCV-29, or AUAP and  
224 LCV-180 (Table S1 in the supplemental material) for the amplification of RNA1- and RNA2-  
225 based sequences, respectively. The cloning of the PCR products into the pGEM-T Easy vector  
226 and the subsequent sequencing steps were as described in Text S1 in the supplemental material.

227

228

229

230

231 **References**

- 232 1 Rabindran, S. & Dawson, W. O. Assessment of recombinants that arise from the use of a  
233 TMV-based transient expression vector. *Virology* **284**, 182-189 (2001).
- 234 2 Sambrook, J. & Russell, D. W. *Molecular Cloning: A Laboratory Manual*. 3rd edn (Cold  
235 Spring Harbor Laboratory Press, 2001).
- 236 3 Wang, Z., Kraft, J. J., Hui, A. Y. & Miller, W. A. Structural plasticity of Barley yellow  
237 dwarf virus-like cap-independent translation elements in four genera of plant viral RNAs.  
238 *Virology* **402**, 177-186 (2010).

239

240

241

242

243

244

245

246

247

248

249

250

251

252

253

254 **Figure legends**

255 **Fig. S1. *In vitro* translation of luciferase-encoding transcripts.** (a) Reporter constructs in  
256 which the *firefly* luciferase gene (F-Luc) is flanked by various 5' and 3' terminal nucleotide (nt)  
257 sequences: LUC-TMV, 5' (68 nts) and 3' (357 nts) NCRs of TMV30BGFP RNA<sup>1</sup>; LUC-R1, 5'  
258 (72 nts) and 3' (226 nts) NCRs of LCV RNA1; LUC-R2A, 5' (268 nts) and 3' (98 nts) NCRs of  
259 LCV RNA2; LUC-R2B and LUC-R2C, essentially LUC-R2A except that LUC-R2B contains 9  
260 additional nts (from the proximal 3' end of the P4.8 ORF) immediately upstream of the 3' NCR  
261 of LCV RNA2, and LUC-R2C contains an additional 302 nts, which include the entire P4.8 ORF  
262 and parts of its upstream intergenic region, immediately upstream of the 3' NCR of LCV RNA2;  
263 LUC-R2CΔSL1 and LUC-R2CΔSL2, essentially LUC-R2C except that stem-loop (SL)1 and  
264 SL2, respectively, in the YSS of LCV RNA2 have been deleted; LUC-R2D and LUC-R2E,  
265 essentially LUC-R2A and LUC-R2C, respectively, except that both contain 99 nts (from the  
266 proximal 5' end of the P5.6 ORF of LCV RNA2) immediately downstream of the 5' NCR of  
267 LCV RNA2; LUC-R2A(-) and LUC-R2C(-), essentially LUC-R2A and LUC-R2C, respectively,  
268 except that the nts downstream of F-Luc have been replaced by GFP sequences (striped boxes)  
269 of equivalent sizes. A partial YSS is represented by a black bar without the “YSS” label, while  
270 the complete YSS is represented by a black bar with “YSS” labeled directly above the bar. The  
271 YSS with deletion of either SL1 or SL2 is labeled “ΔSL1” or “ΔSL2”, respectively. The light  
272 gray and dark gray boxes represent non-coding and coding sequences, respectively. Numbers  
273 above the vertical lines in the constructs, except for those at the 3' flanking region of LUC-R2A(-  
274 ) and LUC-R2C(-), are the nt positions in the genomic RNAs of the respective viruses. (b-c)  
275 Relative luciferase activities from *in vitro* translation of the *in vitro* transcripts of LUC-TMV,  
276 LUC-R1, LUC-R2A, LUC-R2A(-), LUC-R2B, LUC-R2C, LUC-R2CΔSL1, LUC-R2CΔSL2 ,

277 LUC-R2C(-), LUC-R2D and LUC-R2E are as indicated. Luciferase activities were measured  
278 and normalized to that of LUC-R2A (defined as 1.0). Error bars indicate standard error  
279 calculated from three replicated experiments.

280

281 **Fig S2. Stability of wild type and mutant ( $\Delta$ SL1 and  $\Delta$ SL2) LCV RNA2.** Tobacco  
282 protoplasts were inoculated with 2  $\mu$ g of each of the following *in vitro* produced capped  
283 transcripts: LCV RNA2 (WT), LCV RNA2 YSS mutant  $\Delta$ SL1, LCV RNA2 YSS mutant  $\Delta$ SL2,  
284 or with water (dH<sub>2</sub>O), and harvested 3, 12 and 18 hpi. Total RNA (5  $\mu$ g) extracted from each  
285 sample was treated with DNase and subjected to reverse transcription (RT) using either LCV-99-  
286 CM, an LCV RNA2-specific oligo-primer (LCV RNA 2), or NtUbiR, an 18S rRNA-specific  
287 oligo-primer (rRNA) (Supplementary Table S1). The PCR amplification for each sample was  
288 performed over several different cycles (indicated at the top of each lane) using oligo-primers  
289 LCV-99-CM and LCV-70-PW or NtUbiR and NtUbiF (Supplementary Table S1). For the water  
290 (dH<sub>2</sub>O) inoculated protoplasts, only those harvested at 18 hpi were used for RT-PCR analysis.  
291 dH<sub>2</sub>O (-) indicates negative (no template; water) control for RT-PCR.

292

293 **Fig. S3. 3'-terminal *mfold*-predicted secondary structures of selected criniviruses.** *Lettuce*  
294 *infectious yellows virus* (LIYV) RNA1, *Bean yellow disorder virus* (BnYDV) RNAs 1 and 2,  
295 *Beet pseudo-yellows virus* (BPYV) RNAs 1 and 2, *Blackberry yellow vein associated virus*  
296 (BYVaV) RNAs 1 and 2, *Cucurbit chlorotic yellows virus* (CCYV) RNAs 1 and 2, *Cucurbit*  
297 *yellow stunting disorder virus* (CYSDV) RNAs 1 and 2, *Tomato infectious chlorosis virus*  
298 (TICV) RNAs 1 and 2, and *Tomato chlorosis virus* (ToCV) RNAs 1 and 2.

**Table S1. Oligonucleotide primers used for the construction of engineered mutants, structure cassette plasmids, luciferase reporter constructs, 5' RACE and stability assays.**

| <b>Primer</b> | <b>Sequence (5' - 3') and polarity (+ or -)</b>                          | <b>Description</b>                                                                                                                                                 | <b>Purpose</b>                                                                                             |
|---------------|--------------------------------------------------------------------------|--------------------------------------------------------------------------------------------------------------------------------------------------------------------|------------------------------------------------------------------------------------------------------------|
| LCV-27        | TTGAAACCTGTTCAAGACTGCTAAC (+)                                            | Nucleotides corresponding to LCV RNA1 position 7923-7947                                                                                                           | 5' RACE                                                                                                    |
| LCV-28        | ACGAAGGGGTACACCGAATC (+)                                                 | Nucleotides corresponding to LCV RNA1 position 8006-8025                                                                                                           | 5' RACE                                                                                                    |
| LCV-29        | TACAGGAAGACCTGTTACTGTTACA (+)                                            | Nucleotides corresponding to LCV RNA1 position 8076-8100                                                                                                           | 5' RACE                                                                                                    |
| LCV-70-PW     | GTGTCAGGTTCTACGTGTCA (+)                                                 | Nucleotides corresponding to LCV RNA2 position 7592-7611                                                                                                           | Stability Assay (Semi-quantitative RT-PCR)                                                                 |
| LCV-89-CN     | <b>GGCAATTAACCTCACTAAAGAAATCAAACCTTCCTTCGT</b><br><u>ACGAAGAG</u> (+)    | A T3 promoter sequence (bold) and nucleotides corresponding to those of LCV RNA1 position 1-28 (underlined)                                                        | Construction of pLUC-R1                                                                                    |
| LCV-91-CN     | TCATAGTTAACGTATCTGTATCAATAAAGATGTGAGATG (+)                              | Nucleotides corresponding to LCV RNA1 position 7584-7622                                                                                                           | Construction of pS-CM1 and pR1-3'R2                                                                        |
| LCV-92-CN     | <b>CTGAATGCCGGCGGCCTAGTTATTCTATTAAGTAGTCTC</b> (-)                       | A NgoMIV restriction site (bold) and nucleotides complementary to those of LCV RNA1 position 8591-8564 (underlined)                                                | Construction of pLUC-R1                                                                                    |
| LCV-99-AC     | TTGAGAAGTCTGCTTGAATGTTACT (-)                                            | Nucleotides complementary to LCV RNA2 position 7950-7926                                                                                                           | Stability Assay (Semi-quantitative RT-PCR)                                                                 |
| LCV-101-CM    | <i>ccccggGCATGCAATTAACCTCACTAAAGAAATTCCACGG</i><br><u>TTTCCCCGAG</u> (+) | XmaI (italic lower case) and SphI (italic upper case) restriction sites; a T3 promoter (bold) and nucleotides corresponding to LCV RNA2 position 1-23 (underlined) | Construction of luciferase reporter constructs of LCV RNA2 <sup>3</sup>                                    |
| LCV-103-CM    | ATGGGTTCTTGAACAGTCACTACAGGTTTG (+)                                       | Nucleotides corresponding to LCV RNA2 position 7894-7923                                                                                                           | 5' RACE                                                                                                    |
| LCV-161-CM    | TGATAAGTTGAGAGTGTCGATCAGG (+)                                            | Nucleotides corresponding to LCV RNA2 position 7312-7337                                                                                                           | Construction of various pCM1 and pCM2 mutants <sup>1</sup> , pS-CM2, pS-ΔSL1, and pS-ΔSL2, and for 5' RACE |
| LCV-162-CM    | <b>CCCTAGTGGACTAGTTAATTTCCGGATTTA</b> (-)                                | Nucleotides complementary to LCV RNA2 position 8518-8509 (bold) and 8458-8439                                                                                      | Construction of p5'Δ50                                                                                     |
| LCV-163-CM    | <b>TTAACTAGTCCACTAGGGATCGCCTTG</b> (+)                                   | Nucleotides corresponding to LCV RNA2 position 8451-8458 and 8509-8527 (bold)                                                                                      | Construction of p5'Δ50                                                                                     |
| LCV-164-CM    | GGGTTGAGTGTGTTCAGTTTG (-)                                                | Nucleotides complementary to position 514-492 of the pGEM-T Easy backbone of pCM2                                                                                  | Construction of various pCM1 and pCM2 mutants <sup>2</sup>                                                 |

|            |                                                  |                                                                                                                                                                                                        |                                   |
|------------|--------------------------------------------------|--------------------------------------------------------------------------------------------------------------------------------------------------------------------------------------------------------|-----------------------------------|
| LCV-166-CM | <b>GGGCCC</b> <u>CGCGCTAGCTATA</u> (-)           | ApaI (bold) and NgoMIV (underlined) restriction sites, and nucleotides complementary to LCV RNA2 position 8552-8544 (italic)                                                                           | Construction of p3'Δ4             |
| LCV-167-CM | <b>GGGCCC</b> <u>ACCGGTTCTTTGAA</u> CGACGACT (-) | ApaI (bold) and AgeI (underlined) restriction sites, and nucleotides complementary to LCV RNA2 position 8508-8491 (italic)                                                                             | Construction of p3'Δ48            |
| LCV-175-CM | <b>GGGCCC</b> <u>ACCGGTCGTTCA</u> AGGCGATCC (-)  | ApaI (bold) and AgeI (underlined) restriction sites, and nucleotides complementary to LCV RNA2 position 8532-8517 (italic)                                                                             | Construction of p3'Δ24            |
| LCV-176-CM | <b>GGGCCC</b> <u>ACCGGTA</u> CTACTAAGTAGTCG (-)  | ApaI (bold) and AgeI (underlined) restriction sites, and nucleotides complementary to LCV RNA2 position 8545-8530 (italic)                                                                             | Construction of p3'Δ11            |
| LCV-180-AC | TTACGCGTGTGACTTAATTTGAGAG (+)                    | Nucleotides corresponding to LCV RNA2 position 8290-8314                                                                                                                                               | 5' RACE                           |
| LCV-188-CM | <b>GGGCCC</b> <u>CGCGGCCCTAGTGG</u> ATTCTTT (-)  | ApaI (bold) and NgoMIV (underlined) restriction sites, and nucleotides complementary to LCV RNA2 position 8518-8503 (italic)                                                                           | Construction of p3'Δ38            |
| LCV-189-CM | <b>CTACTAACTAGACTTTATTTAATGTAATTCTACGG</b> (-)   | Nucleotides complementary to LCV RNA2 position 8543-8534 (bold) and 8494-8470                                                                                                                          | Construction of pΔSL1             |
| LCV-190-CM | AATAAAGTCTAGTTAGTAGTATAGCTAGGCCG (+)             | Nucleotides corresponding to LCV RNA2 position 8486-8494 and 8534-8556 (bold)                                                                                                                          | Construction of pΔSL1             |
| LCV-191-CM | <i>ACTACAGCAACAAGGCGATCCCTAGT</i> (-)            | Nucleotides complementary to LCV RNA2 positions 8537-8534 (italic) and 8527-8512 (underlined); and designed for substituting nucleotides from position 8533-8528 with non-viral nucleotides (bold)     | Construction of pSLD1-1 and pSLR1 |
| LCV-192-CM | <u>CTTGTTGCTGTAGTTAGTAGTATAGCTAGG</u> (+)        | Nucleotides corresponding to LCV RNA2 positions 8524-8527 (underlined) and 8534-8553 (italic); and designed for substituting nucleotides from position 8528-8533 with non-viral nucleotides (bold)     | Construction of pSLD1-1 and pSLR1 |
| LCV-193-CM | <i>TTGTTGCTGGACTTTATTTAATGTAATT</i> (-)          | Nucleotides complementary to LCV RNA2 positions 8504-8501 (italic) and 8494-8476 (underlined); and designed for the substituting nucleotides from position 8500-8495 with non-viral nucleotides (bold) | Construction of pSLD1-2 and pSLR1 |
| LCV-194-CM | <u>AGTCCAGCAACAAAAGAA</u> TCCACTAGG (+)          | Nucleotides corresponding to LCV RNA2 positions 8491-8494 (underlined) and 8501-8517 (italic); and designed for substituting nucleotides from position 8495-8500 with non-viral nucleotides (bold)     | Construction of pSLD1-2 and pSLR1 |
| LCV-219-CM | <b>CGGTCTAAATAAATTTAGTCAATTTT</b> GAGATTTTAC (-) | Nucleotides complementary to LCV RNA2 position 8472-8459 (bold) and LCV RNA1 position 8491-8470                                                                                                        | Construction of pR1-3'R2          |
| LCV-220-CM | AATTGACTAAATTTATTTAGACCGTAGAATTAC (+)            | Nucleotides corresponding to LCV RNA2 position 8459-8481 (bold) and LCV RNA1 position 8482-8491                                                                                                        | Construction of pR1-3'R2          |
| LCV-221-CM | <b>CTAATATATTTTCTAGT</b> TAAATTTTCGGGATTTAAC (-) | Nucleotides complementary to LCV RNA1 position 8503-8492 (bold) and LCV RNA2 position 8458-8437                                                                                                        | Construction of pR2-3'R1          |

|            |                                                                                      |                                                                                                                                                                                                     |                                                                          |
|------------|--------------------------------------------------------------------------------------|-----------------------------------------------------------------------------------------------------------------------------------------------------------------------------------------------------|--------------------------------------------------------------------------|
| LCV-222-CM | CGAAATTAAGTAACTAGAAAATATATTAGACCGTAG (+)                                             | Nucleotides corresponding to LCV RNA1 position 8492-8510 (bold) and LCV RNA2 position 8446-8458                                                                                                     | Construction of pR2-3'R1                                                 |
| LCV-223-CM | GCAGTGAGCGCAACGCAATTA (-)                                                            | Nucleotides complementary to position 289-309 of the pGEM-T Easy backbone of pCM1                                                                                                                   | Construction of pR2-3'R1                                                 |
| LCV-285-CM | gccggc <b>GAACCGGACCGAAGCCCG</b> <u>ATTGCGAGCGGCGAA</u><br><u>CCGCTCGAGCGGCC</u> (-) | NgoMIV restriction site (lower case), RT primer binding site (bold), 3'-linker (underlined), XhoI restriction site (italic underlined) and nucleotides complementary to LCV RNA2 position 8556-8552 | Construction of pS-CM1, pS-CM2, pS-ΔSL1, and pS-ΔSL2                     |
| LCV-286-CM | <b>GAACGACGACTCTAGTTAATTT</b> CGGGATTAAAC (-)                                        | Nucleotides complementary to LCV RNA2 positions 8501-8492 (bold) and 8459-8437                                                                                                                      | Construction of pΔSL2                                                    |
| LCV-287-CM | ATTAAGTAACTAGAGT <b>CGTTCGTTCAAAGAATCCAC</b> (+)                                     | Nucleotides corresponding to LCV RNA2 positions 8450-8459 and 8492-8513 (bold)                                                                                                                      | Construction of pΔSL2                                                    |
| LCV-288-CM | <b>ATTGCGAGCGGCGA</b> <u>ACCGCTCGAGCGGCCTAGCTATACT</u><br>ACTAACTAGTCGTTTC (-)       | RT primer binding site (bold), 3'-linker (underlined), XhoI restriction site (italic underlined) and nucleotides complementary to LCV RNA2 position 8556-8527                                       | Construction of pS-CM2 and pS-ΔSL2                                       |
| LCV-289-CM | <b>ATTGCGAGCGGCGA</b> <u>ACCGCTCGAGCGGCCTAGCTATACT</u><br>ACTAACTAgacttta (-)        | RT primer binding site (bold), 3'-linker (underlined), XhoI restriction site (italic underlined), nucleotides complementary to LCV RNA2 positions 8556-8534 and 8494-8488 (lower case)              | Construction of pS-ΔSL1                                                  |
| LCV-290-CM | <b>ATGTTTTTGGCGTCTTCCATTAAGGAAGCGATGTTGAGG</b><br>G (-)                              | Nucleotides complementary to luciferase gene position 20-1 (bold) and LCV RNA1 position 72-53                                                                                                       | Construction of pLUC-R1                                                  |
| LCV-291-CM | <b>GCGGAAAGTCCAAATTGTAATTAGTGATTAATTAGAAAA</b><br>T (+)                              | Nucleotides corresponding to luciferase gene position 1634-1653 (bold) and LCV RNA1 position 8366-8385                                                                                              | Construction of pLUC-R1                                                  |
| LCV-292-CM | ATTTTCTAATTAATCACTAATT <b>TACAATTTGGACTTTCCGC</b><br>CC (-)                          | Nucleotides complementary to LCV RNA1 position 8385-8366 and luciferase gene position 1653-1632 (bold)                                                                                              | Construction of pLUC-R1                                                  |
| LCV-293-CM | <b>ATGTTTTTGGCGTCTTCCATGATCGTTGACACCAGTTCAG</b><br>(-)                               | Nucleotides complementary to luciferase gene position 20-1 (bold) and LCV RNA2 position 268-249                                                                                                     | Construction of luciferase reporter constructs of LCV RNA 2 <sup>4</sup> |
| LCV-295-CM | <b>GGGCCCGCCGGCGGCCTAGCTATACTACTAA</b> (-)                                           | ApaI (bold) and NgoMIV (underlined) restriction sites, and nucleotides complementary to LCV RNA2 position 8556-8537 (italic)                                                                        | Construction of luciferase reporter constructs of LCV RNA 2 <sup>3</sup> |
| LCV-296-CM | ATTCTACGGTCTAAATAAATTT <b>TACAATTTGGACTTTCCGC</b><br>CC (-)                          | Nucleotides complementary to LCV RNA2 position 8478-8459 and luciferase gene position 1653-1632 (bold)                                                                                              | Construction of pLUC-R2A                                                 |
| LCV-297-CM | <b>GCGGAAAGTCCAAATTGTAATAACTAGATTTATTTAGA</b><br>CCGTAG (+)                          | Nucleotides corresponding to luciferase gene position 1634-1653 (bold) and LCV RNA2 position 8450-8475                                                                                              | Construction of pLUC-R2B                                                 |



|            |                                                                                |                                                                                                                                                               |                                                             |
|------------|--------------------------------------------------------------------------------|---------------------------------------------------------------------------------------------------------------------------------------------------------------|-------------------------------------------------------------|
| LCV-301-CM | <b>GCGGAAAGTCCAAATTGTA</b> ATTATAATATAGTTATGTATA<br>A (+)                      | Nucleotides corresponding to luciferase gene position 1634-1653 (bold) and LCV RNA2 position 8157-8177                                                        | Construction of pLUC-R2C, pLUC-R2CΔSL1, and pLUC-R2CΔSL2    |
| LCV-302-CM | TATACATAACTATATTATA <b>ATTACAATTTGGACTTTCCGC</b><br>CC (-)                     | Nucleotides complementary to LCV RNA2 position 8176-8157 and luciferase gene position 1653-1632 (bold)                                                        | Construction of pLUC-R2C, pLUC-R2CΔSL1, and pLUC-R2CΔSL2    |
| LCV-303-CM | <b>GCGGAAAGTCCAAATTGTA</b> AAATTTATTTAGACCGTAGAA<br>T (+)                      | Nucleotides corresponding to luciferase gene position 1634-1653 (bold) and LCV RNA2 position 8459-8478                                                        | Construction of pLUC-R2A                                    |
| LCV-304-CM | GTCTAAATAAATCTAGTTA <b>ATTACAATTTGGACTTTCCG</b><br>CCC (-)                     | Nucleotides complementary to LCV RNA2 position 8470-8450 and luciferase gene position 1653-1632 (bold)                                                        | Construction of pLUC-R2B                                    |
| LCV-305-CM | <b>ATGTTTTTGGCGTCTTCC</b> ATTTTCGTCACCCGCCATCGTGA<br>G (-)                     | Nucleotides complementary to luciferase gene position 20-1 (bold) and LCV RNA2 position 367-347                                                               | Construction of pLUC-R2D and pLUC-R2E                       |
| LCV-306-CM | CTCACGATGGCGGGTGACGAA <b>ATGGAAGACGCCAAAAAC</b><br>(+)                         | Nucleotides complementary to LCV RNA2 position 347-367 and luciferase gene position 1-18 (bold)                                                               | Construction of pLUC-R2D and pLUC-R2E                       |
| LCV-307-CM | TTGAACACCATAAGAGA <b>ATTACAATTTGGACTTTCCGCC</b><br>C (-)                       | Nucleotides complementary to TMV30BGFP position 5970-5953 and luciferase gene position 1653-1632 (bold)                                                       | Construction of pLUC-R2A(-) and pLUC-R2C(-)                 |
| LCV-308-CM | <b>GCGGAAAGTCCAAATTGTA</b> ATTCTCTTATGGTGTTCAATG<br>(+)                        | Nucleotides corresponding to luciferase gene position 1634-1653 (bold) and TMV30BGFP position 5953-5972                                                       | Construction of pLUC-R2A(-) and pLUC-R2C(-)                 |
| LCV-309-CM | gggccc <b>GCCGGCGTTC</b> TCTGTACATAACCTTC (-)                                  | ApaI (lower case) and NgOMIV (bold) restriction sites, and nucleotides complementary to TMV30BGFP position 6050-6031 (underlined)                             | Construction of pLUC-R2A(-)                                 |
| LCV-310-CM | gggccc <b>GCCGGCTGGTAAAAGGACAGGGCC</b> (-)                                     | ApaI (lower case) and NgOMIV (bold) restriction sites, and nucleotides complementary to TMV30BGFP position 6352-6334 (underlined)                             | Construction of pLUC-R2C(-)                                 |
| LCV-311-CM | <b><u>ATTTGCGAGCGGCGAACCGCTCGAGCGGC</u></b> CTAGTTA<br>TTCTATTAAGTAGTCTCTC (-) | RT primer binding site (bold), 3'-linker (underlined), XhoI restriction site (italic underlined) and nucleotides complementary to LCV RNA1 position 8591-8562 | Construction of pS-CM1                                      |
| LUC-001-CM | ATGGAAGACGCCAAAAACATAAAAG (+)                                                  | Nucleotides corresponding to luciferase gene position 1-24                                                                                                    | Construction of luciferase reporter constructs <sup>5</sup> |
| LUC-002-CM | TTACAATTTGGACTTTCCGCC (-)                                                      | Nucleotides complementary to luciferase gene position 1653-1632                                                                                               | Construction of luciferase reporter constructs <sup>5</sup> |
| TMV-001-CM | <b>GGCAATTAACCTCACTAAAGTATTTTACAACAATTACC</b><br>(+)                           | A T3 promoter sequence (bold) and nucleotides corresponding to those of TMV30BGFP position 1-20 (underlined)                                                  | Construction of pLUC-TMV                                    |

|            |                                                                |                                                                                                          |                                            |
|------------|----------------------------------------------------------------|----------------------------------------------------------------------------------------------------------|--------------------------------------------|
| TMV-002-CM | <b>ATGTTTTTGGCGTCTTCCATTGTAATTGTAAATAGTAATT</b><br>G (-)       | Nucleotides complementary to luciferase gene position 20-1 (bold) and TMV30BGFP position 68-48           | Construction of pLUC-TMV                   |
| TMV-003-CM | <b>GCGGAAAGTCCAAATTGTA</b> ACTATTGTTGTGAGATTTCC<br>(+)         | Nucleotides corresponding to luciferase gene position 1634-1653 (bold) and TMV30BGFP position 7320-7338  | Construction of pLUC-TMV                   |
| TMV-004-CM | <u>GGTACCTGGGCCGCTACCCGCGGTTAG</u> (-)                         | Nucleotides complementary to TMV30BGFP position 7682-7656 including a KpnI restriction site (underlined) | Construction of pLUC-TMV                   |
| TMV-005-CM | GGAAATCTCACAACAATAG <b>TTACAATTTGGAC</b><br><b>TTCCGCC</b> (-) | Nucleotides complementary to TMV30BGFP position 7338-7320 and luciferase gene position 1653-1632 (bold)  | Construction of pLUC-TMV                   |
| AAP(C)     | GGCCACGCGTCGACTAGTACGGGIIGGGIIGGGIIIG (-)                      | 5' RACE Abridged Anchor Primer with a poly G/I tract                                                     | 5' RACE                                    |
| AAP(T)     | GGCCACGCGTCGACTAGTACAAAAAAAAAAAAAAAAAAAA (-)                   | 5' RACE Abridged Anchor Primer with a poly A tract                                                       | 5' RACE                                    |
| AUAP       | GGCCACGCGTCGACTAGTAC (-)                                       | 5' RACE Abridged Universal Amplification Primer                                                          | 5' RACE                                    |
| NtUbiF     | TGCTTAACACATGCAAGTCGGA (+)                                     | Nucleotides corresponding to 18S rRNA                                                                    | Stability Assay (Semi-quantitative RT-PCR) |
| NtUbiR     | AGCCGTTTCCAGCTGTTGTTC (-)                                      | Nucleotides complementary to 18S rRNA                                                                    | Stability Assay (Semi-quantitative RT-PCR) |
| LUC-005-JZ | TGGATACCGGAAAACGCTG (+)                                        | Nucleotides complementary to <i>firefly</i> luciferase gene of replicons in position 1127-1146           | Construction of F-Luc probe                |
| LUC-006-JZ | CACAACCTCTCCGCGCAACT (-)                                       | Nucleotides complementary to <i>firefly</i> luciferase gene of replicons in position 1532-1551           | Construction of F-Luc probe                |

<sup>1</sup> pR2-3'R1, p5'Δ50, p3'Δ48, p3'Δ4, p3'Δ11, p3'Δ24, p3'Δ38, pΔSL1, pSLD1-1, pSLD1-2, pSLR1, and pΔSL2.

<sup>2</sup> pR1-3'R2, p5'Δ50, pΔSL1, pSLD1-1, pSLD1-2, pSLR1, and pΔSL2.

<sup>3</sup> pLUC-R2A, pLUC-R2B, pLUC-R2C, pLUC-R2CΔSL1, pLUC-R2CΔSL2, pLUC-R2D, and pLUC-R2E.

<sup>4</sup> pLUC-R2A, pLUC-R2B, pLUC-R2C, pLUC-R2CASL1, and pLUC-R2CASL2.

<sup>5</sup> pLUC-R1, pLUC-R2A, pLUC-R2B, pLUC-R2C, pLUC-R2CASL1, pLUC-R2CASL2, and pLUC-TMV.

# Figure S1

(a)

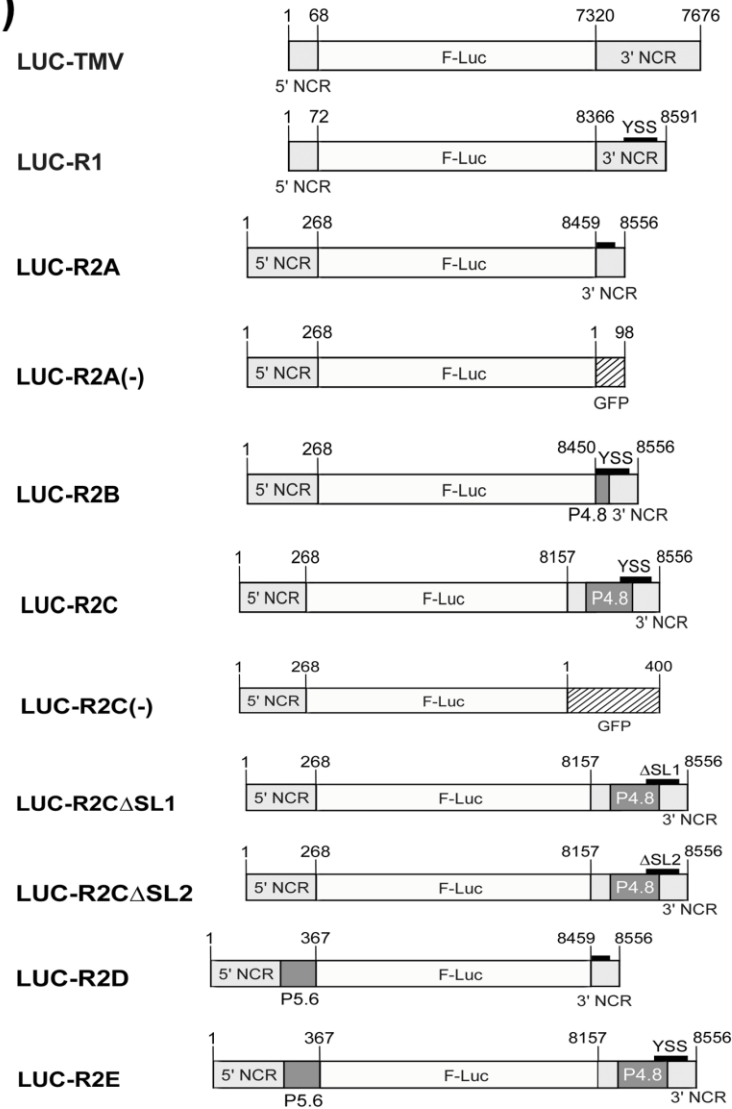

(b)

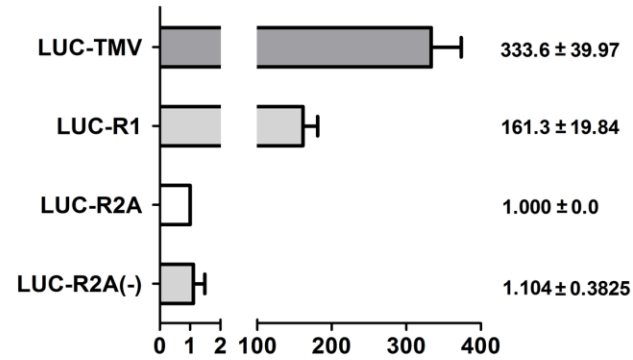

(c)

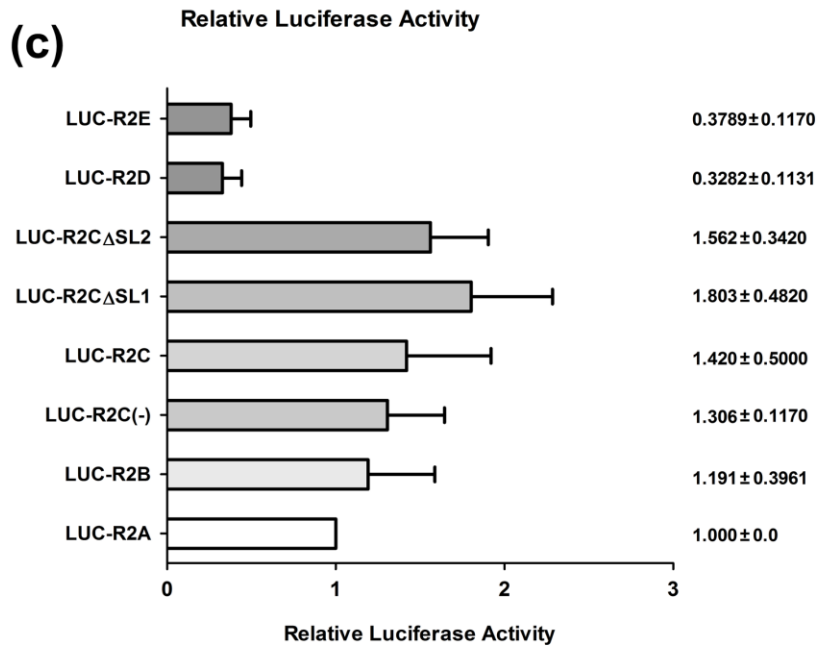

**Figure S2**

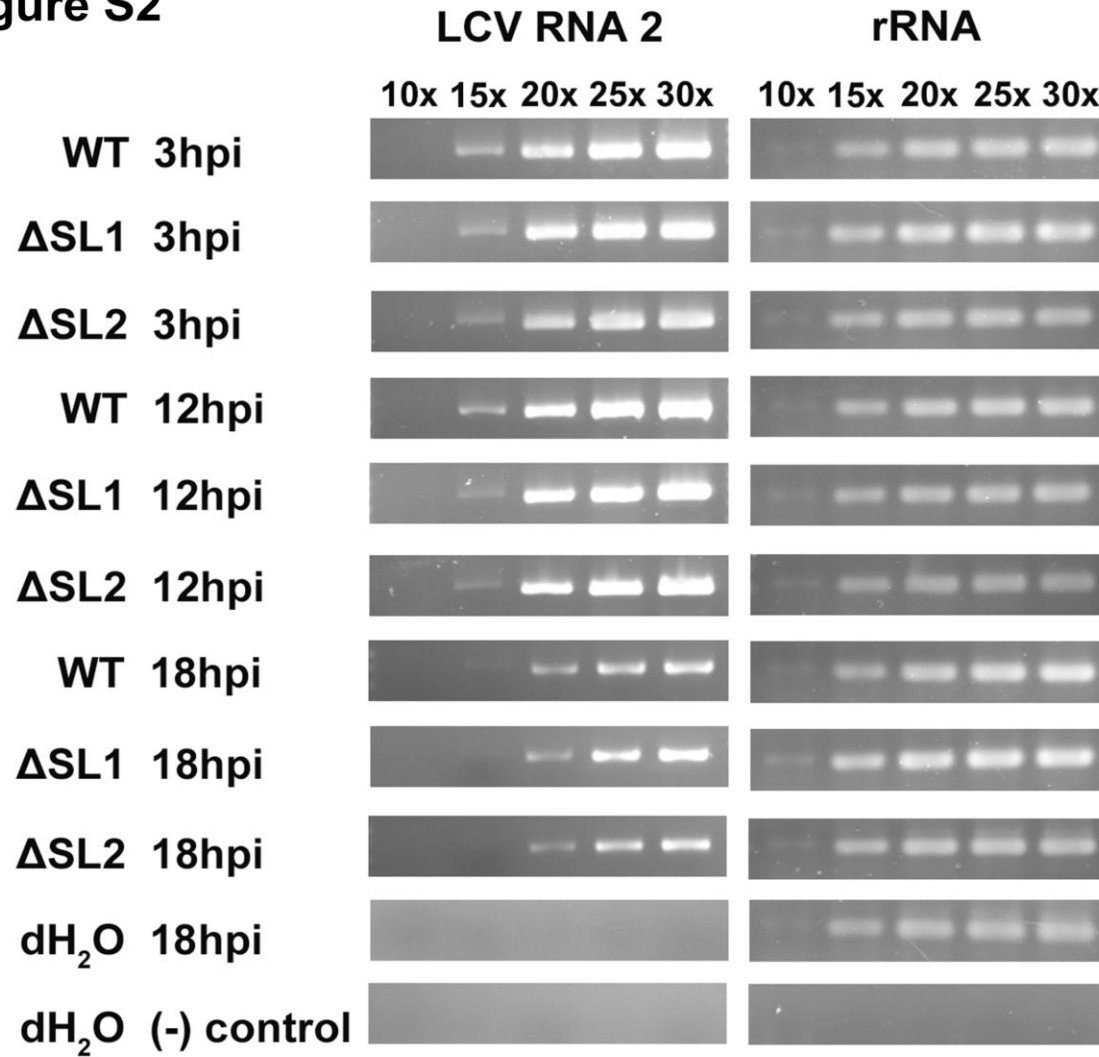

**Figure S3**

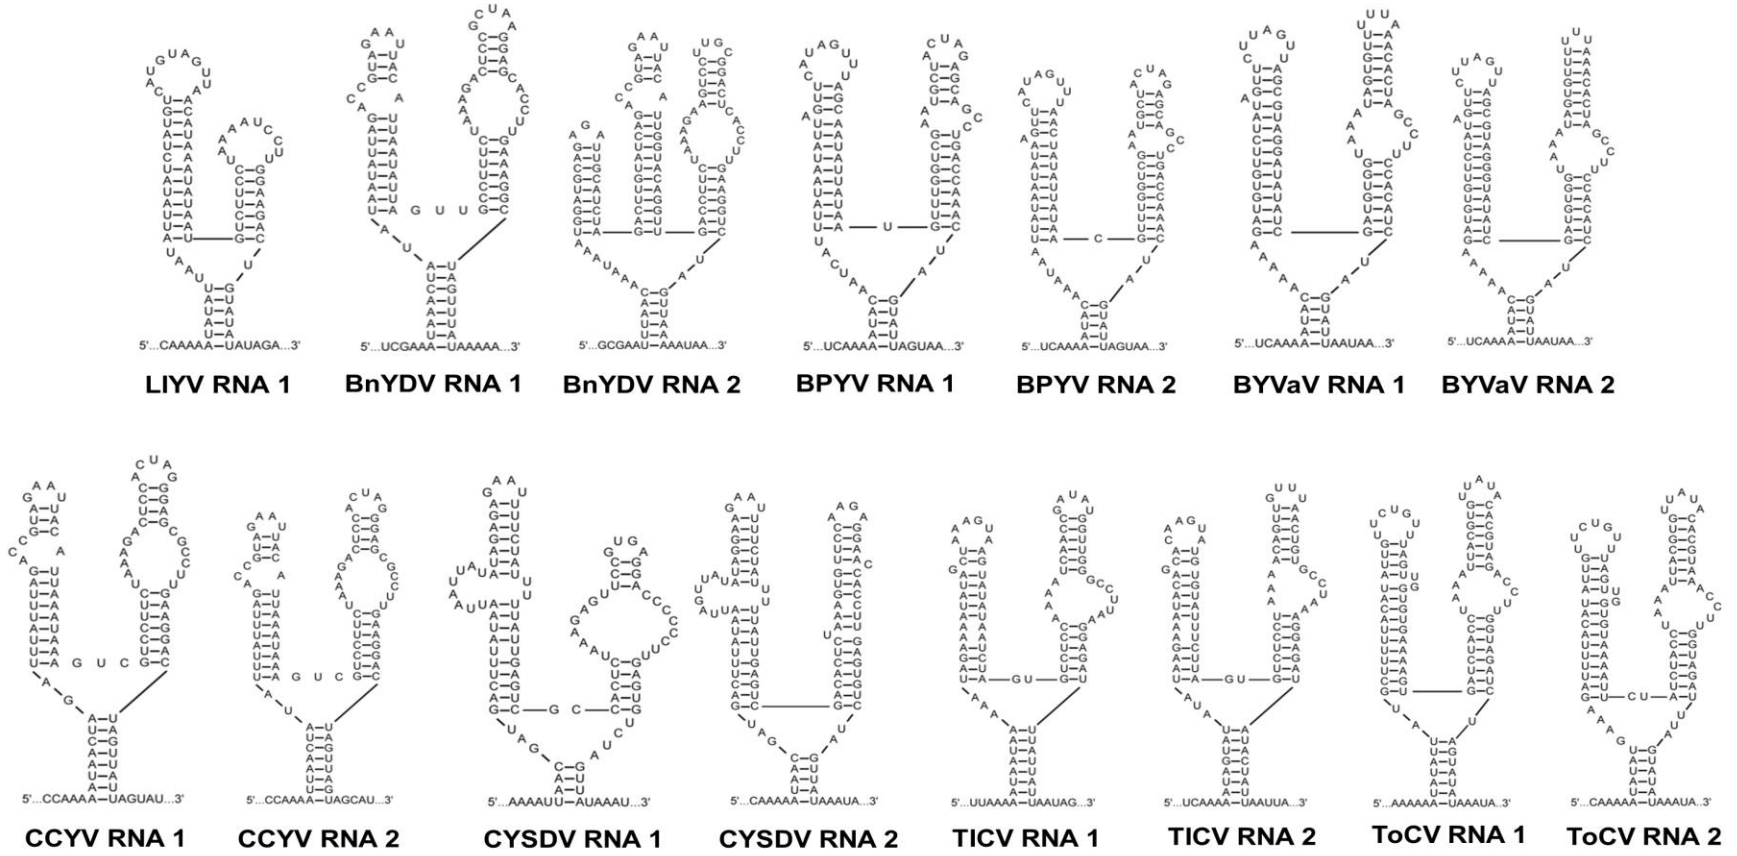

Supplement: srep34482-s1.pdf [file srep34482-s1.pdf]
